# Supplementary material for: General Practitioners’ Awareness and Perception of Current Pneumococcal Vaccination for Adult Patients with Known Risk Factors in Switzerland: Evidence from a Survey
Source: MDPI journal article supplement (doi:10.3390/vaccines11061101), 2023-06-15
Supplement: s1 [file s1]

## Supplementary File 1

**Table S1.** Reclassification of the 26 Swiss cantons into seven major statistical regions of Switzerland.

| Major statistical regions | Cantons                                                                                             |
|---------------------------|-----------------------------------------------------------------------------------------------------|
| Central Switzerland       | Lucerne, Nidwalden, Obwalden, Schwyz, Uri, Zug                                                      |
| Eastern Switzerland       | Appenzell Ausserrhoden, Appenzell Innerrhoden, Glarus, Grisons, Schaffhausen, , St. Gallen, Thurgau |
| Espace Mittelland         | Berne, Fribourg, Solothurn, Neuchâtel, Jura                                                         |
| Lake Geneva               | Geneva, Valais, Vaud                                                                                |
| North-West Switzerland    | Aargau, Basel-Stadt, Basel-Landschaft                                                               |
| Ticino                    | Ticino                                                                                              |
| Zurich                    | Zurich                                                                                              |

**Table S2.** Ordinal logistic regression on perceived complexity of vaccination recommendations [1;4] (N = 300).

| Variable                                          | Unadjusted model |               | Adjusted model |               |
|---------------------------------------------------|------------------|---------------|----------------|---------------|
|                                                   | OR               | 95% CI        | aOR            | 95% CI        |
| <b>Gender</b>                                     |                  |               |                |               |
| Male                                              | Ref.             |               | Ref.           |               |
| Female                                            | 1.228            | 0.799 - 1.888 | 1.299          | 0.817 - 2.064 |
| <b>Age</b>                                        |                  |               |                |               |
| 40 or younger                                     | Ref.             |               | Ref.           |               |
| 41-45                                             | 0.822            | 0.372 - 1.819 | 0.804          | 0.352 - 1.836 |
| 46-50                                             | 1.423            | 0.673 - 3.010 | 1.483          | 0.651 - 3.375 |
| 51-55                                             | 0.926            | 0.447 - 1.918 | 0.771          | 0.304 - 1.957 |
| 56-60                                             | 0.824            | 0.388 - 1.750 | 0.882          | 0.313 - 2.482 |
| 61 or older                                       | 1.368            | 0.620 - 3.017 | 1.391          | 0.436 - 4.432 |
| <b>Practice experience</b>                        |                  |               |                |               |
| 2-10 years                                        | Ref.             |               | Ref.           |               |
| 11-15 years                                       | 0.893            | 0.485 - 1.644 | 0.833          | 0.421 - 1.649 |
| 16-20 years                                       | 1.309            | 0.666 - 2.574 | 1.483          | 0.632 - 3.480 |
| 21-25 years                                       | 0.702            | 0.381 - 1.292 | 0.677          | 0.284 - 1.614 |
| 26+ years                                         | 1.216            | 0.633 - 2.337 | 1.018          | 0.358 - 2.899 |
| <b>Number of patients with known risk factors</b> |                  |               |                |               |
| 0-20                                              | Ref.             |               | Ref.           |               |
| 21-50                                             | 0.786            | 0.460 - 1.344 | 0.862          | 0.497 - 1.497 |
| 51-100                                            | 0.749            | 0.414 - 1.353 | 0.744          | 0.404 - 1.369 |
| More than 100                                     | 0.774            | 0.386 - 1.553 | 0.761          | 0.373 - 1.552 |
| <b>Major region practising in</b>                 |                  |               |                |               |
| Lake Geneva region                                | Ref.             |               | Ref.           |               |
| Espace Mittelland                                 | 1.322            | 0.673 - 2.595 | 1.717          | 0.608 - 4.852 |
| North-West Switzerland                            | 0.846            | 0.405 - 1.767 | 1.098          | 0.301 - 4.009 |
| Zurich                                            | 1.390            | 0.708 - 2.730 | 1.949          | 0.563 - 6.750 |
| Eastern Switzerland                               | 0.702            | 0.332 - 1.484 | 0.825          | 0.225 - 3.020 |
| Central Switzerland                               | 1.313            | 0.629 - 2.741 | 1.883          | 0.519 - 6.827 |
| <b>Practising language</b>                        |                  |               |                |               |
| German                                            | Ref.             |               | Ref.           |               |
| French                                            | 1.036            | 0.633 - 1.696 | 1.293          | 0.436 - 3.836 |
| <b>Vaccination attitudes</b>                      |                  |               |                |               |
| Confidence                                        | 0.973            | 0.905 - 1.045 | 0.969          | 0.897 - 1.047 |
| Calculation                                       | 0.978            | 0.903 - 1.060 | 0.958          | 0.878 - 1.044 |
| N                                                 | 300              |               | 300            |               |

\*  $p < 0.05$ ; \*\*  $p < 0.01$ , aOR: adjusted odds ratio; CI: confidence interval.

**Table S3.** Ordinal logistic regressions on attitudes towards pneumococcal disease for adult patients with known risk.

| Variable      | I think that the pneumococcal disease is serious enough to justify vaccination [1;7] |                | Pneumococcal disease can cause considerable morbidity and mortality [1;7] |               | Pneumococcal vaccination is even more important during the COVID-19 pandemic [1;7] |               | Simplification of vaccination guidelines would result in more at-risk patients being vaccinated [1;7] |               | The pneumococcal disease has a mild disease course [1;7] |               | The risk of pneumococcal disease is low [1;7] |               | I am worried about the potential side effects of the pneumococcal vaccine [1;7] |               | Pneumococcal vaccination should mainly target children because of herd immunity [1;7] |               |
|---------------|--------------------------------------------------------------------------------------|----------------|---------------------------------------------------------------------------|---------------|------------------------------------------------------------------------------------|---------------|-------------------------------------------------------------------------------------------------------|---------------|----------------------------------------------------------|---------------|-----------------------------------------------|---------------|---------------------------------------------------------------------------------|---------------|---------------------------------------------------------------------------------------|---------------|
|               | aOR                                                                                  | 95% CI         | aOR                                                                       | 95% CI        | aOR                                                                                | 95% CI        | aOR                                                                                                   | 95% CI        | aOR                                                      | 95% CI        | aOR                                           | 95% CI        | aOR                                                                             | 95% CI        | aOR                                                                                   | 95% CI        |
| <b>Gender</b> |                                                                                      |                |                                                                           |               |                                                                                    |               |                                                                                                       |               |                                                          |               |                                               |               |                                                                                 |               |                                                                                       |               |
| Male          | Ref.                                                                                 |                | Ref.                                                                      |               | Ref.                                                                               |               | Ref.                                                                                                  |               | Ref.                                                     |               | Ref.                                          |               | Ref.                                                                            |               | Ref.                                                                                  |               |
| Female        | 1.783                                                                                | 1.071 - 2.969* | 1.046                                                                     | 0.653 - 1.677 | 1.205                                                                              | 0.757 - 1.919 | 1.298                                                                                                 | 0.824 - 2.043 | 0.793                                                    | 0.495 - 1.269 | 0.713                                         | 0.452 - 1.123 | 0.752                                                                           | 0.474 - 1.193 | 1.298                                                                                 | 0.811 - 2.076 |

| Age<br>40 or<br>younger                               | Ref.  |                    | Ref.  |                    | Ref.  |                    | Ref.  |                  | Ref.  |                    | Ref.  | 1.000 -<br>1.000   | Ref.  |                     | Ref.  |                    |
|-------------------------------------------------------|-------|--------------------|-------|--------------------|-------|--------------------|-------|------------------|-------|--------------------|-------|--------------------|-------|---------------------|-------|--------------------|
| 41-45                                                 | 0.982 | 0.396 -<br>2.437   | 0.360 | 0.151 -<br>0.860*  | 0.911 | 0.397 -<br>2.089   | 1.495 | 0.682 -<br>3.279 | 1.447 | 0.613 -<br>3.418   | 1.204 | 0.521 -<br>2.784   | 1.169 | 0.504 -<br>2.713    | 1.427 | 0.612 -<br>3.325   |
| 46-50                                                 | 1.343 | 0.526 -<br>3.427   | 0.609 | 0.254 -<br>1.462   | 0.725 | 0.313 -<br>1.677   | 1.680 | 0.744 -<br>3.794 | 1.161 | 0.484 -<br>2.785   | 0.948 | 0.410 -<br>2.194   | 0.864 | 0.362 -<br>2.058    | 0.992 | 0.420 -<br>2.341   |
| 51-55                                                 | 1.108 | 0.404 -<br>3.043   | 0.410 | 0.159 -<br>1.057   | 0.966 | 0.384 -<br>2.430   | 0.979 | 0.399 -<br>2.401 | 1.397 | 0.536 -<br>3.637   | 0.942 | 0.373 -<br>2.381   | 0.935 | 0.360 -<br>2.427    | 0.874 | 0.335 -<br>2.280   |
| 56-60                                                 | 1.387 | 0.452 -<br>4.253   | 0.370 | 0.133 -<br>1.030   | 0.912 | 0.333 -<br>2.498   | 0.808 | 0.301 -<br>2.169 | 1.119 | 0.391 -<br>3.202   | 1.030 | 0.375 -<br>2.831   | 0.730 | 0.255 -<br>2.089    | 1.153 | 0.405 -<br>3.286   |
| 61 or older                                           | 1.794 | 0.504 -<br>6.392   | 0.763 | 0.231 -<br>2.519   | 1.261 | 0.407 -<br>3.902   | 1.469 | 0.470 -<br>4.597 | 1.066 | 0.329 -<br>3.458   | 0.877 | 0.285 -<br>2.695   | 0.527 | 0.164 -<br>1.698    | 0.850 | 0.265 -<br>2.731   |
| <b>Practice experi-<br/>ence</b>                      |       |                    |       |                    |       |                    |       |                  |       |                    |       |                    |       |                     |       |                    |
| 2-10 years                                            | Ref.  |                    | Ref.  |                    | Ref.  |                    | Ref.  |                  | Ref.  |                    | Ref.  |                    | Ref.  |                     | Ref.  |                    |
| 11-15 years                                           | 0.784 | 0.368 -<br>1.668   | 1.129 | 0.560 -<br>2.276   | 1.331 | 0.669 -<br>2.650   | 0.984 | 0.504 -<br>1.923 | 1.171 | 0.580 -<br>2.365   | 1.258 | 0.645 -<br>2.455   | 1.379 | 0.686 -<br>2.773    | 1.233 | 0.618 -<br>2.462   |
| 16-20 years                                           | 0.912 | 0.359 -<br>2.321   | 0.700 | 0.295 -<br>1.659   | 1.574 | 0.678 -<br>3.651   | 1.244 | 0.529 -<br>2.924 | 1.154 | 0.491 -<br>2.711   | 1.273 | 0.556 -<br>2.917   | 0.941 | 0.394 -<br>2.245    | 1.188 | 0.490 -<br>2.881   |
| 21-25 years                                           | 0.608 | 0.238 -<br>1.551   | 0.979 | 0.421 -<br>2.280   | 1.241 | 0.531 -<br>2.900   | 0.959 | 0.406 -<br>2.270 | 0.942 | 0.401 -<br>2.213   | 0.726 | 0.315 -<br>1.675   | 1.273 | 0.538 -<br>3.010    | 1.420 | 0.586 -<br>3.439   |
| 26+ years                                             | 0.345 | 0.111 -<br>1.076   | 0.385 | 0.137 -<br>1.083   | 0.738 | 0.272 -<br>2.004   | 0.417 | 0.150 -<br>1.163 | 1.787 | 0.630 -<br>5.068   | 1.666 | 0.622 -<br>4.461   | 4.644 | 1.648 -<br>13.083** | 1.509 | 0.527 -<br>4.315   |
| <b>Number of patients with<br/>known risk factors</b> |       |                    |       |                    |       |                    |       |                  |       |                    |       |                    |       |                     |       |                    |
| 0-20                                                  | Ref.  |                    | Ref.  |                    | Ref.  |                    | Ref.  |                  | Ref.  |                    | Ref.  |                    | Ref.  |                     | Ref.  |                    |
| 21-50                                                 | 1.142 | 0.626 -<br>2.084   | 1.543 | 0.882 -<br>2.699   | 0.677 | 0.390 -<br>1.177   | 0.942 | 0.552 -<br>1.606 | 0.996 | 0.561 -<br>1.769   | 0.945 | 0.544 -<br>1.641   | 0.581 | 0.329 -<br>1.025    | 0.601 | 0.340 -<br>1.063   |
| 51-100                                                | 1.579 | 0.801 -<br>3.112   | 1.696 | 0.909 -<br>3.166   | 1.282 | 0.692 -<br>2.375   | 0.810 | 0.447 -<br>1.468 | 0.690 | 0.368 -<br>1.292   | 0.757 | 0.414 -<br>1.387   | 0.658 | 0.359 -<br>1.205    | 0.814 | 0.441 -<br>1.504   |
| More than<br>100                                      | 1.796 | 0.825 -<br>3.912   | 2.620 | 1.252 -<br>5.485*  | 2.076 | 1.008 -<br>4.273*  | 0.657 | 0.325 -<br>1.331 | 0.877 | 0.426 -<br>1.808   | 0.623 | 0.306 -<br>1.271   | 0.648 | 0.321 -<br>1.305    | 0.259 | 0.123 -<br>0.546** |
| <b>Major region<br/>practising in</b>                 |       |                    |       |                    |       |                    |       |                  |       |                    |       |                    |       |                     |       |                    |
| Lake Ge-<br>neva region                               | Ref.  |                    | Ref.  |                    | Ref.  |                    | Ref.  |                  | Ref.  |                    | Ref.  |                    | Ref.  |                     | Ref.  |                    |
| Espace Mit-<br>telland                                | 0.263 | 0.080 -<br>0.864*  | 0.514 | 0.175 -<br>1.507   | 0.355 | 0.120 -<br>1.049   | 1.573 | 0.517 -<br>4.783 | 2.649 | 0.813 -<br>8.633   | 3.672 | 1.240 -<br>10.876* | 0.784 | 0.269 -<br>2.285    | 3.546 | 1.123 -<br>11.196* |
| North-West<br>Switzerland                             | 0.409 | 0.094 -<br>1.777   | 0.490 | 0.126 -<br>1.899   | 0.308 | 0.079 -<br>1.202   | 1.107 | 0.286 -<br>4.292 | 1.826 | 0.442 -<br>7.541   | 3.271 | 0.862 -<br>12.407  | 0.522 | 0.138 -<br>1.973    | 1.983 | 0.490 -<br>8.017   |
| Zurich                                                | 0.458 | 0.114 -<br>1.835   | 0.481 | 0.135 -<br>1.717   | 0.548 | 0.155 -<br>1.947   | 1.261 | 0.351 -<br>4.528 | 2.792 | 0.720 -<br>10.828  | 3.954 | 1.101 -<br>14.207* | 0.666 | 0.188 -<br>2.360    | 2.374 | 0.629 -<br>8.965   |
| Eastern<br>Switzerland                                | 0.346 | 0.081 -<br>1.474   | 0.338 | 0.089 -<br>1.285   | 0.558 | 0.146 -<br>2.126   | 1.096 | 0.291 -<br>4.123 | 4.573 | 1.105 -<br>18.916* | 5.077 | 1.342 -<br>19.204* | 1.178 | 0.310 -<br>4.472    | 3.528 | 0.886 -<br>14.051  |
| Central<br>Switzerland                                | 0.298 | 0.071 -<br>1.250   | 0.289 | 0.076 -<br>1.093   | 0.467 | 0.126 -<br>1.736   | 0.876 | 0.235 -<br>3.273 | 4.426 | 1.086 -<br>18.042* | 4.883 | 1.304 -<br>18.283* | 0.546 | 0.147 -<br>2.030    | 2.852 | 0.726 -<br>11.208  |
| <b>Practising lan-<br/>guage</b>                      |       |                    |       |                    |       |                    |       |                  |       |                    |       |                    |       |                     |       |                    |
| German                                                | Ref.  |                    | Ref.  |                    | Ref.  |                    | Ref.  |                  | Ref.  |                    | Ref.  |                    | Ref.  |                     | Ref.  |                    |
| French                                                | 0.941 | 0.281 -<br>3.149   | 1.031 | 0.338 -<br>3.150   | 0.713 | 0.232 -<br>2.195   | 2.755 | 0.873 -<br>8.697 | 0.839 | 0.256 -<br>2.744   | 1.555 | 0.513 -<br>4.713   | 0.500 | 0.165 -<br>1.516    | 0.917 | 0.287 -<br>2.930   |
| <b>Vaccination atti-<br/>tudes</b>                    |       |                    |       |                    |       |                    |       |                  |       |                    |       |                    |       |                     |       |                    |
| Confidence                                            | 1.391 | 1.263 -<br>1.531** | 1.214 | 1.118 -<br>1.318** | 1.180 | 1.088 -<br>1.280** | 1.079 | 0.997 -<br>1.167 | 0.886 | 0.821 -<br>0.956** | 0.925 | 0.859 -<br>0.995*  | 0.847 | 0.782 -<br>0.917**  | 0.936 | 0.867 -<br>1.010   |
| Calculation                                           | 1.160 | 1.053 -<br>1.277** | 1.024 | 0.938 -<br>1.118   | 1.134 | 1.034 -<br>1.243** | 1.075 | 0.988 -<br>1.170 | 0.994 | 0.911 -<br>1.084   | 0.939 | 0.862 -<br>1.023   | 1.017 | 0.930 -<br>1.112    | 0.904 | 0.827 -<br>0.988*  |
| N                                                     | 300   |                    | 300   |                    | 300   |                    | 300   |                  | 300   |                    | 300   |                    | 300   |                     | 300   |                    |

\*  $p < 0.05$ ; \*\*  $p < 0.01$ ; aOR: adjusted odds ratio; CI: confidence interval.

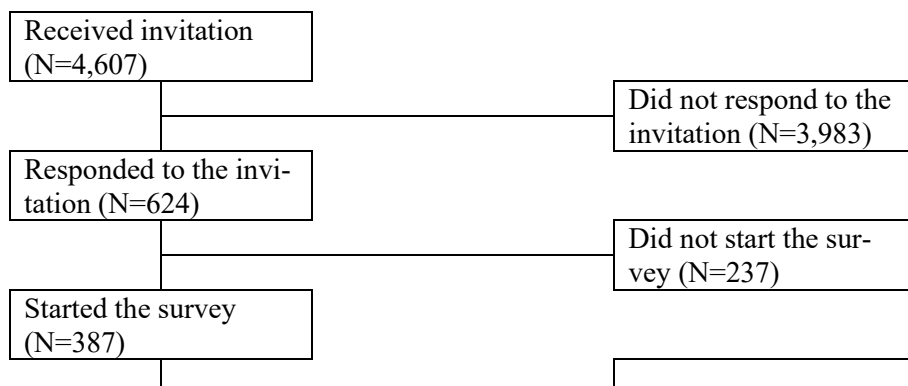

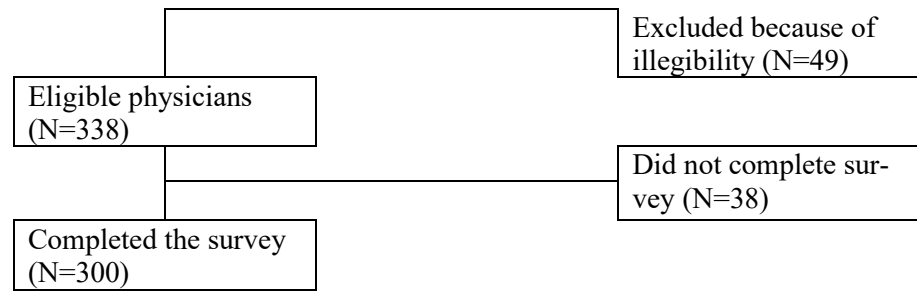

**Figure S1.** Patient flow through the study.

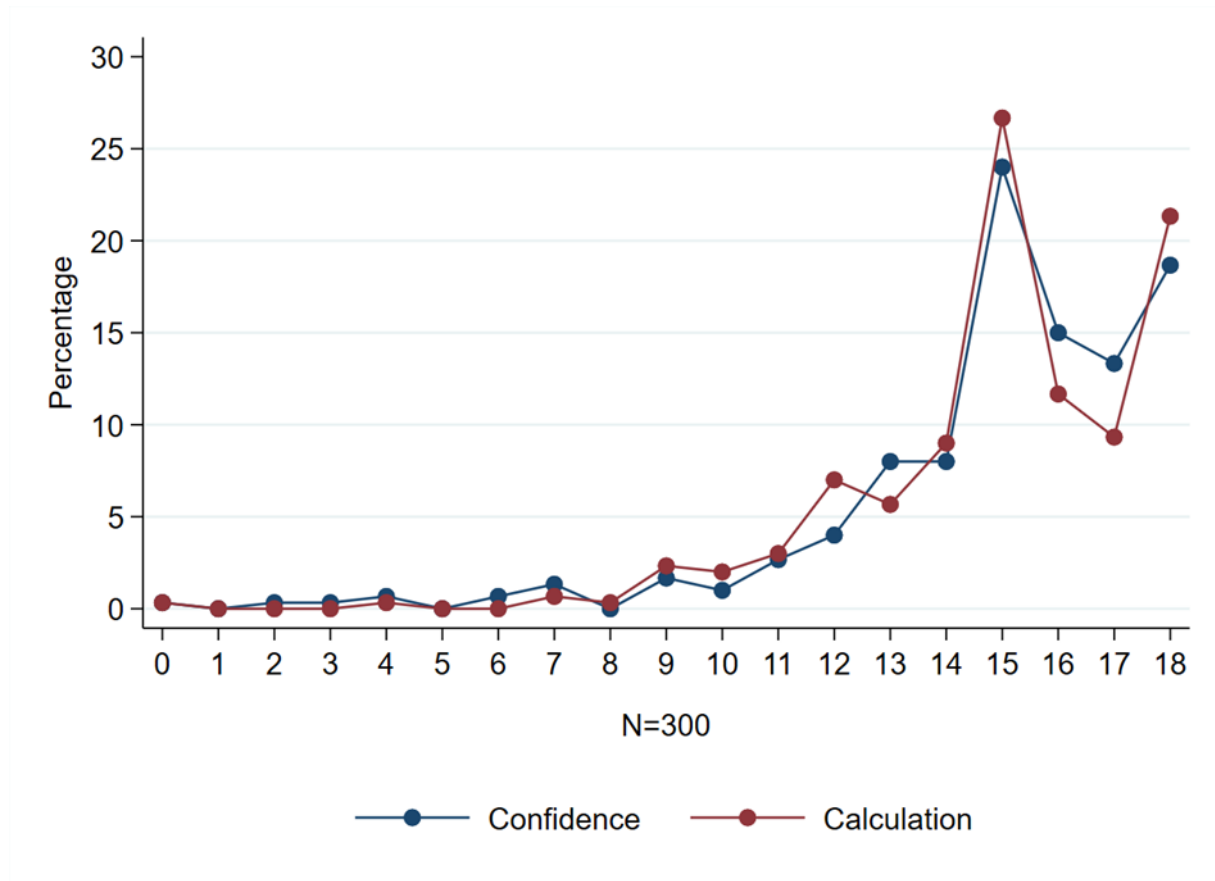

**Figure S2.** Distribution of scores in the 5C measure of psychological antecedents of vaccinations (N = 300).

Note: Confidence is defined as trust in the effectiveness and safety of vaccines and the health system delivering them, including the reliability and competence of the health services and health professionals and the motivations of vaccination policies. Individuals with high confidence have positive attitudes towards vaccination. Calculation refers to individuals' engagement in extensive information searching. A high calculation score indicates that the individuals evaluate risks of infections and vaccination to achieve a good decision.

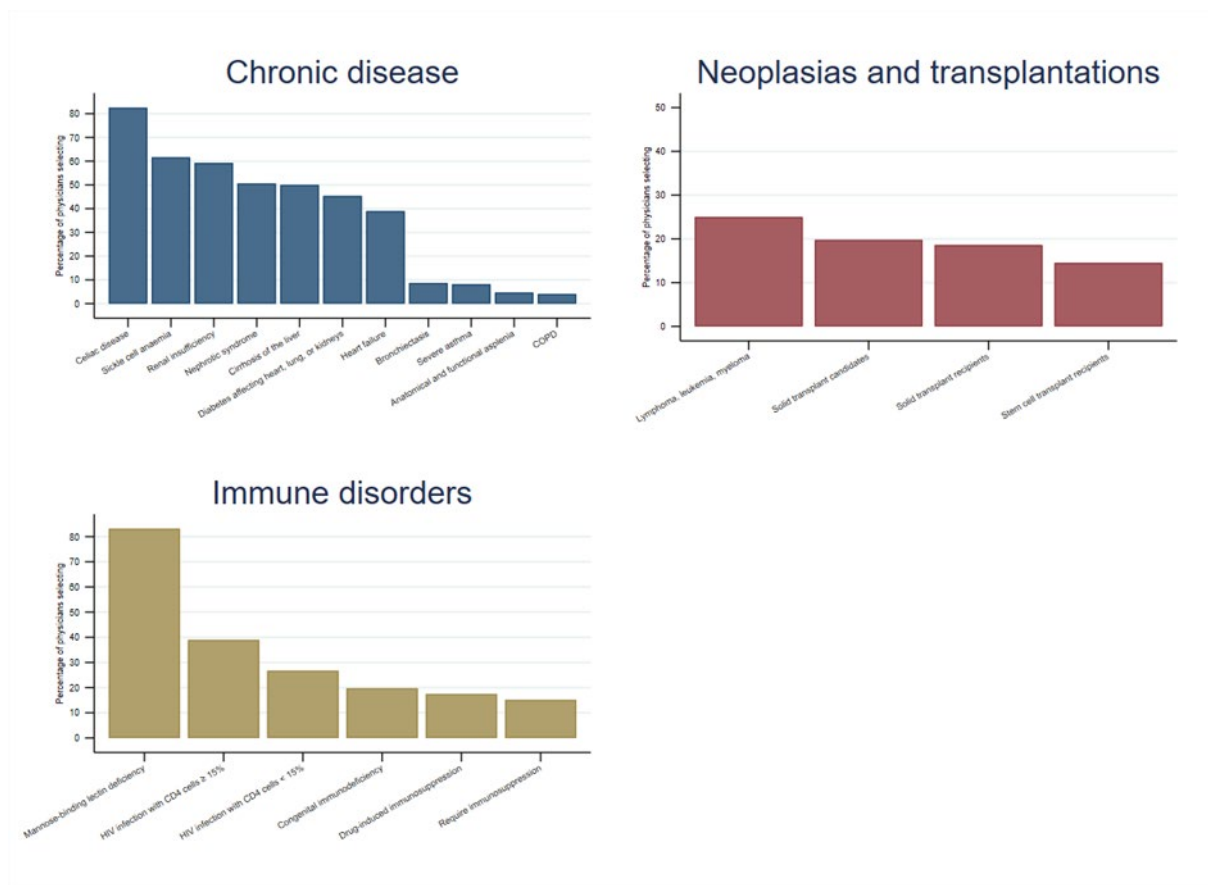

**Figure S3.** Risk groups GPs were not aware of (N=172).

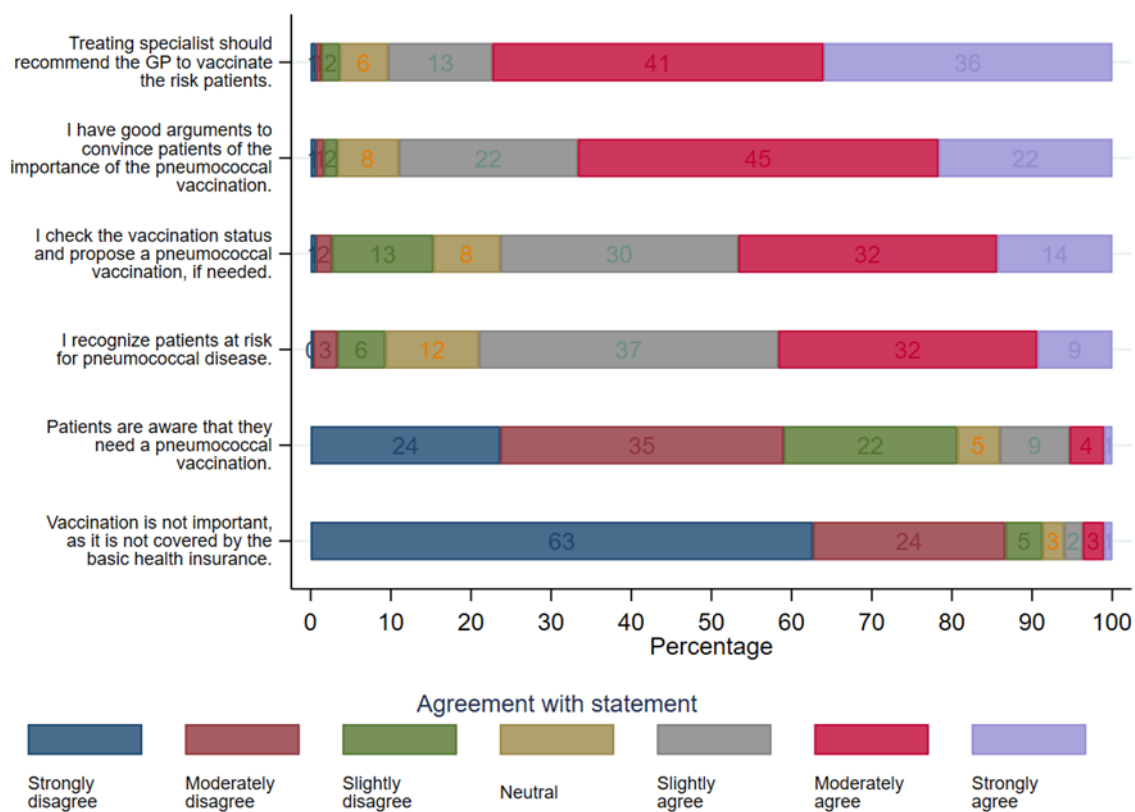

**Figure S4.** Perceptions and attitudes about pneumococcal vaccination (N = 300).

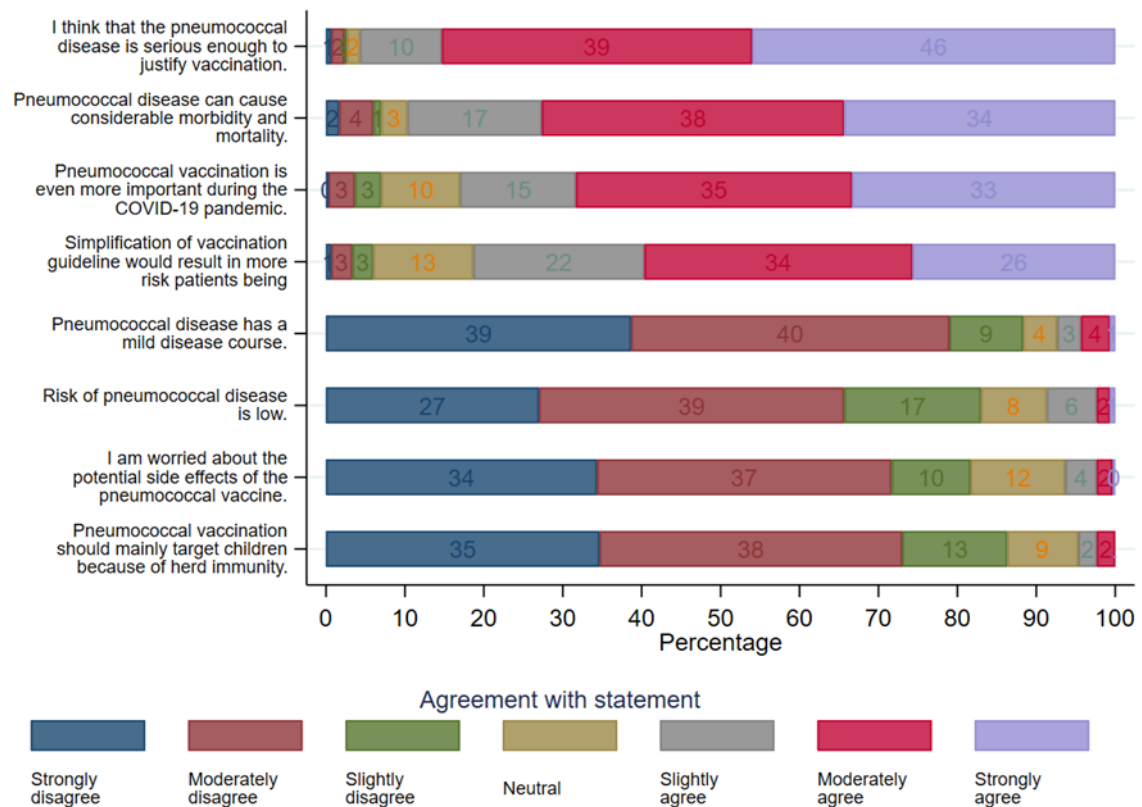

**Figure S5.** Knowledge and attitudes towards pneumococcal disease in adult risk patients (N = 300).
